# Supplementary material for: Effects of Floral Scent, Color and Pollen on Foraging Decisions and Oocyte Development of Common Green Bottle Flies
Source: PLoS One. 2015 Dec 30;10(12):e0145055. doi: 10.1371/journal.pone.0145055 (PMC4696748; doi:10.1371/journal.pone.0145055)
Supplement: S1 Dataset — (XLSX) [file pone.0145055.s001.xlsx]

## Sheet: Objective 1 (Exp. 1-6)
Objective 1 (experiments 1-6): Investigate the effect of color cues on attraction of L. sericata
Exp 1. Yellow Vs Green
Replicate #	Yellow Male	Yellow Female	Yellow Total (Male + Female)	Prop. (Male + Female) Yellow	Green Male	Green Female	Green Total (Male + Female)	Prop. (Male + Female) Green	Total Responding (Both Sexes/ All Colour)	Age (Days)
1	15	32	47	0.661972	13	11	24	0.338028	71	3
2	17	23	40	0.547945	12	21	33	0.452055	73	3
3	16	18	34	0.557377	13	14	27	0.442623	61	3
4	25	19	44	0.60274	13	16	29	0.39726	73	3
5	14	15	29	0.408451	17	25	42	0.591549	71	3
6	20	15	35	0.538462	13	17	30	0.461538	65	3
7	30	32	62	0.805195	2	13	15	0.194805	77	3
8	23	19	42	0.575342	16	15	31	0.424658	73	3
9	12	33	45	0.762712	6	8	14	0.237288	59	3
10	20	28	48	0.727273	12	6	18	0.272727	66	3
11	23	31	54	0.568421	15	26	41	0.431579	95	3
12	24	43	67	0.744444	8	15	23	0.255556	90	3
13	34	17	51	0.6375	16	13	29	0.3625	80	3
14	19	25	44	0.488889	21	25	46	0.511111	90	3
15	15	26	41	0.694915	15	3	18	0.305085	59	3
Average	20.4667	25.0667	45.5333	0.621443	12.8	15.2	28	0.378557	73.5333
Std. Error	1.58525	2.09413	2.60744	0.0286161	1.2	1.77335	2.52228	0.0286161	2.91117
Exp. 2. Yellow Vs White
Replicate #	Yellow Male	Yellow Female	Yellow Total (Male + Female)	Prop. (Male + Female) Yellow	White Male	White Female	White Total (Male + Female)	Prop. (Male + Female) White	Total Responding (Both Sexes/ All Colour)	Age (Days)
1	14	15	29	0.878788	3	1	4	0.121212	33	2
2	3	5	8	0.347826	8	7	15	0.652174	23	2
3	7	14	21	0.954545	1	0	1	0.0454545	22	2
4	12	7	19	0.475	13	8	21	0.525	40	2
5	12	9	21	0.75	5	2	7	0.25	28	2
6	18	11	29	0.878788	2	2	4	0.121212	33	2
7	9	6	15	0.576923	4	7	11	0.423077	26	2
8	23	12	35	0.921053	3	0	3	0.0789474	38	2
9	8	9	17	0.62963	6	4	10	0.37037	27	2
10	14	9	23	0.676471	4	7	11	0.323529	34	2
11	8	11	19	0.59375	2	11	13	0.40625	32	2
12	8	17	25	0.757576	2	6	8	0.242424	33	2
13	6	12	18	0.75	3	3	6	0.25	24	2
14	4	7	11	0.423077	2	13	15	0.576923	26	2
15	3	9	12	0.333333	11	13	24	0.666667	36	2
Average	9.93333	10.2	20.1333	0.663117	4.6	5.6	10.2	0.336883	30.3333
Std. Error	1.45559	0.879394	1.892	0.0526996	0.909212	1.13305	1.7021	0.0526996	1.4464
Exp. 3. Yellow Vs Black
Replicate #	Yellow Male	Yellow Female	Yellow Total (Male + Female)	Prop. (Male + Female) Yellow	Black Male	Black Female	Black Total (Male + Female)	Prop. (Male + Female) Black	Total Responding (Both Sexes/ All Colour)	Age (Days)
1	31	20	51	0.809524	5	7	12	0.190476	63	2
2	11	34	45	0.775862	9	4	13	0.224138	58	2
3	28	29	57	0.863636	6	3	9	0.136364	66	2
4	18	24	42	0.823529	6	3	9	0.176471	51	2
5	27	29	56	0.848485	7	3	10	0.151515	66	2
6	32	30	62	0.837838	8	4	12	0.162162	74	2
7	20	25	45	0.789474	6	6	12	0.210526	57	2
8	13	16	29	0.805556	2	5	7	0.194444	36	2
9	26	28	54	0.771429	12	4	16	0.228571	70	2
10	17	19	36	0.654545	11	8	19	0.345455	55	2
11	10	19	29	0.47541	7	25	32	0.52459	61	2
12	15	17	32	0.64	11	7	18	0.36	50	2
13	12	13	25	0.555556	10	10	20	0.444444	45	2
14	7	14	21	0.525	5	14	19	0.475	40	2
15	10	12	22	0.488889	9	14	23	0.511111	45	2
Average	18.4667	21.9333	40.4	0.710982	7.6	7.8	15.4	0.289018	55.8
Std. Error	2.15995	1.80335	3.53863	0.0362162	0.709124	1.54673	1.70378	0.0362162	2.89367
Exp. 4. Yellow Vs Blue
Replicate #	Yellow Male	Yellow Female	Yellow Total (Male + Female)	Prop. (Male + Female) Yellow	Blue Male	Blue Female	Blue Total (Male + Female)	Prop. (Male + Female) Blue	Total Responding (Both Sexes/ All Colour)	Age (Days)
1	25	27	52	0.787879	4	10	14	0.212121	66	3
2	17	31	48	0.8	3	9	12	0.2	60	3
3	18	27	45	0.775862	6	7	13	0.224138	58	3
4	12	24	36	0.72	6	8	14	0.28	50	3
5	5	14	19	0.542857	10	6	16	0.457143	35	3
6	8	37	45	0.818182	4	6	10	0.181818	55	3
7	27	32	59	0.951613	0	3	3	0.0483871	62	3
8	13	25	38	0.716981	4	11	15	0.283019	53	3
9	15	27	42	0.666667	8	13	21	0.333333	63	3
10	9	15	24	0.521739	7	15	22	0.478261	46	3
11	15	26	41	0.672131	12	8	20	0.327869	61	3
12	14	25	39	0.684211	9	9	18	0.315789	57	3
13	19	40	59	0.880597	3	5	8	0.119403	67	3
14	8	33	41	0.82	6	3	9	0.18	50	3
15	19	24	43	0.796296	0	11	11	0.203704	54	3
Average	14.9333	27.1333	42.0667	0.743668	5.46667	8.26667	13.7333	0.256332	55.8
Std. Error	1.59901	1.80704	2.80215	0.0298995	0.882996	0.886226	1.34684	0.0298995	2.15848
Exp. 5. Yellow Vs Red
Replicate #	Yellow Male	Yellow Female	Yellow Total (Male + Female)	Prop. (Male + Female) Yellow	Red Male	Red Female	Red Total (Male + Female)	Prop. (Male + Female) Red	Total Responding (Both Sexes/ All Colour)	Age (Days)
1	14	11	25	0.568182	9	10	19	0.431818	44	1
2	17	11	28	0.823529	4	2	6	0.176471	34	1
3	16	7	23	0.69697	6	4	10	0.30303	33	1
4	5	6	11	0.733333	4	0	4	0.266667	15	1
5	6	8	14	0.636364	5	3	8	0.363636	22	1
6	5	6	11	0.6875	2	3	5	0.3125	16	1
7	15	11	26	1	0	0	0	0	26	1
8	5	2	7	0.636364	3	1	4	0.363636	11	1
9	2	2	4	0.666667	2	0	2	0.333333	6	1
10	3	3	6	0.857143	1	0	1	0.142857	7	1
11	16	23	39	0.672414	11	8	19	0.327586	58	1
12	19	17	36	0.9	2	2	4	0.1	40	1
13	16	12	28	0.756757	5	4	9	0.243243	37	1
14	15	13	28	0.8	2	5	7	0.2	35	1
15	21	30	51	0.836066	7	3	10	0.163934	61	1
Average	11.6667	10.8	22.4667	0.751419	4.2	3	7.2	0.248581	29.6667
Std. Error	1.67237	2.0076	3.49676	0.0301309	0.788005	0.762202	1.46775	0.0301309	4.42145
Exp. 6. Yellow Vs UV
Replicate #	Yellow Male	Yellow Female	Yellow Total (Male + Female)	Prop. (Male + Female) Yellow	UV Male	UV Female	UV Total (Male + Female)	Prop. (Male + Female) UV	Total Responding (Both Sexes/ All Colour)	Age (Days)
1	14	16	30	0.491803	17	14	31	0.508197	61	3
2	16	18	34	0.465753	22	17	39	0.534247	73	3
3	19	14	33	0.478261	23	13	36	0.521739	69	3
4	10	4	14	0.197183	30	27	57	0.802817	71	3
5	32	19	51	0.6	19	15	34	0.4	85	3
6	23	24	47	0.635135	11	16	27	0.364865	74	3
7	11	6	17	0.209877	26	38	64	0.790123	81	3
8	24	28	52	0.565217	21	19	40	0.434783	92	3
9	16	25	41	0.532468	17	19	36	0.467532	77	3
10	10	10	20	0.27027	17	37	54	0.72973	74	3
11	18	16	34	0.453333	20	21	41	0.546667	75	3
12	12	14	26	0.320988	25	30	55	0.679012	81	3
13	21	10	31	0.402597	21	25	46	0.597403	77	3
14	5	10	15	0.348837	12	16	28	0.651163	43	3
15	29	26	55	0.585106	19	20	39	0.414894	94	3
Average	17.3333	16	33.3333	0.437122	20	21.8	41.8	0.562878	75.1333
Std. Error	1.93629	1.90488	3.51956	0.0364121	1.29099	2.06144	2.87717	0.0364121	3.16809

## Sheet: Objective 2 (Exp. 7)
Objective 2 (experiment 7): Investigate the effect of Oxeye daisy floral odor on attraction of L. sericata
Exp 7. Oxeye daisy inflorescence odor
Replicate #	Flower + Stem Male	Flower + Stem Female	Flower + Stem Total (Male + Female)	Prop. Flower + Stem (Male + Female)	Stem Male	Stem Female	Stem Total (Male + Female)	Prop. Stem (Male + Female)	Total Responders	Age (Days)
1	29	21	50	0.60241	9	24	33	0.39759	83	3
2	26	30	56	0.643678	5	26	31	0.356322	87	3
3	10	18	28	0.4375	20	16	36	0.5625	64	3
4	29	31	60	0.612245	25	13	38	0.387755	98	3
5	20	35	55	0.6875	15	10	25	0.3125	80	3
6	21	33	54	0.739726	9	10	19	0.260274	73	3
7	27	17	44	0.458333	23	29	52	0.541667	96	3
8	34	24	58	0.659091	12	18	30	0.340909	88	3
9	23	33	56	0.727273	9	12	21	0.272727	77	3
10	27	23	50	0.588235	21	14	35	0.411765	85	3
Ave.	24.6	26.5	51.1	0.615599	14.8	17.2	32	0.384401	83.1
Std. Error	2.08273	2.1095	2.95315	0.0321652	2.2151	2.16949	2.99258	0.0321652	3.2402

## Sheet: Objective 3 (Exp. 8-11)
Objective 3 (experiment 8-11): Investigate potential interactions between color cues and Oxeye daisy inflorescence olfactory cues on attraction of L. sericata
Exp 8. Yellow with Oxeye daisy Vs black with Oxeye daisy
	Yellow + Daisy			Black + Daisy				No Response
Replicate #	Male	Female	Total (Male + Female)	Male	Female	Total (M&F)	Total Responders	Male	Female	Total (Male + Female)	N	Age
1	15	19	34	3	1	4	38	41	48	89	127	3
2	29	18	47	1	0	1	48	40	44	84	132	2
3	29	16	45	3	0	3	48	36	37	73	121	2
4	9	18	27	1	2	3	30	36	38	74	104	3
5	32	15	47	4	1	5	52	45	41	86	138	2
6	32	33	65	6	7	13	78	19	8	27	105	3
7	23	38	61	14	7	21	82	16	10	26	108	3
8	37	37	74	6	23	29	103	21	17	38	141	3
9	9	5	14	4	2	6	20	45	50	95	115	3
10	9	25	34	43	12	55	89	12	21	33	122	3
Avg.	22.4	22.4	44.8	8.5	5.5	14	58.8	31.1	31.4	62.5	121.3
Std Error	3.46153	3.37375	5.80383	4.00902	2.30579	5.38723	8.70479	4.01788	5.0204	8.86848	4.21123
Exp. 9. Yellow alone Vs black alone
	Yellow (Empty)			Black (Empty)				No Response
Replicate #	Male	Female	Total (Male + Female)	Male	Female	Total (M&F)	Total Responders	Male	Female	Total (Male + Female)	N	Age
1	10	7	17	2	3	5	22	45	31	76	98	3
2	13	15	28	6	5	11	39	45	28	73	112	3
3	5	3	8	1	0	1	9	53	37	90	99	2
4	11	3	14	1	3	4	18	40	24	64	82	3
5	12	12	24	4	0	4	28	37	33	70	98	3
6	12	13	25	17	17	34	59	14	14	28	87	2
7	15	15	30	21	12	33	63	20	12	32	95	3
8	6	2	8	11	10	21	29	26	23	49	78	3
9	16	21	37	6	4	10	47	21	19	40	87	3
10	5	3	8	10	19	29	37	17	22	39	76	3
Avg.	10.5	9.4	19.9	7.9	7.3	15.2	35.1	31.8	24.3	56.1	91.2
Std Error	1.25831	2.10924	3.28448	2.16256	2.1605	4.07649	5.52057	4.36857	2.55626	6.71557	3.53648
Exp. 10. Yellow alone Vs black with Oxeye daisy
	Yellow (Empty)			Black + Daisy				No Response
Replicate #	Male	Female	Total (Male + Female)	Male	Female	Total (M&F)	Total Responders	Male	Female	Total (Male + Female)	N	Age
1	20	29	49	23	23	46	95	8	18	26	121	3
2	21	26	47	36	30	66	113	11	17	28	141	3
3	10	3	13	4	7	11	24	46	45	91	115	3
4	20	29	49	18	24	42	91	15	9	24	115	2
5	20	29	49	18	24	42	91	15	9	24	115	3
6	16	11	27	3	2	5	32	40	28	68	100	2
7	1	2	3	15	22	37	40	60	47	107	147	2
8	32	31	63	12	16	28	91	19	14	33	124	3
9	32	32	64	17	24	41	105	7	13	20	125	3
10	7	4	11	11	7	18	29	47	41	88	117	2
Avg.	17.25	17.625	34.875	12.25	15.75	28	71.1	31.125	25.75	56.875	122
Std Error	3.14625	4.07213	7.02575	3.00389	2.97191	5.78734	11.131	6.13514	4.75032	10.6931	4.28952
Exp. 11 Yellow with Oxeye daisy Vs Black alone
	Yellow + Daisy			Black (Empty)				No Response
Replicate #	Male	Female	Total (Male + Female)	Male	Female	Total (Male + Female)	Total Responders	Male	Female	Total (Male + Female)	N	Age
1	30	27	57	0	0	0	57	36	28	64	121	2
2	12	4	16	0	1	1	17	48	43	91	108	3
3	30	25	55	22	10	32	87	21	10	31	118	3
4	21	34	55	27	11	38	93	17	19	36	129	3
5	59	52	111	5	4	9	120	8	9	17	137	3
6	34	42	76	8	4	12	88	15	12	27	115	3
7	32	34	66	7	4	11	77	28	22	50	127	3
8	33	16	49	0	0	0	49	41	25	66	115	2
9	35	18	53	1	0	1	54	39	45	84	138	2
10	16	14	30	0	1	1	31	43	57	100	131	3
Avg.	30.2222	26.5556	56.7778	7.77778	3.88889	11.6667	67.3	28.8889	26.8889	55.7778	123.9
Std Error	4.07649	4.53431	8.06612	3.0948	1.28452	4.36463	9.89618	4.33641	5.17687	9.14598	3.18137

## Sheet: Objective 4 (12-17)
Objective 4 (experiments 12-17): Determine whether L. sericata females can mature their ovaries on a pollen diet
Folicle Developement:
Stage I- Groups stages 1-3 and represents non-vitallogenic flolicles
Stage II- Groups stages 4-9 and represents vitallogenic, but not mature
Stage III- Stage 10, mature and chorionated
Exp. 12. Sugar (Negative Control)
Replicate	Stage I	Prop. Stage I	Stage II	Prop. Stage II	Stage III	Prop. Stage III	N
1	29	1	0	0	0	0	29
2	30	1	0	0	0	0	30
3	30	1	0	0	0	0	30
4	27	1	0	0	0	0	27
5	29	1	0	0	0	0	29
6	30	1	0	0	0	0	30
7	30	1	0	0	0	0	30
8	30	1	0	0	0	0	30
9	30	1	0	0	0	0	30
Avg.	29.4444	1	0	0	0	0	29.4444
Std. Error	0.32059	0	0	0	0	0	0.32059
Exp. 13. Oxeye daisy
Replicate	Stage I	Prop. Stage I	Stage II	Prop. Stage II	Stage III	Prop. Stage III	N
1	16	0.842105	3	0.157895	0	0	19
2	20	0.869565	3	0.130435	0	0	23
3	27	0.964286	1	0.0357143	0	0	28
4	18	0.818182	4	0.181818	0	0	22
5	21	0.875	3	0.125	0	0	24
6	18	0.947368	1	0.0526316	0	0	19
7	20	0.909091	2	0.0909091	0	0	22
8	20	0.8	5	0.2	0	0	25
9	18	0.692308	8	0.307692	0	0	26
Avg.	19.7778	0.857545	3.2	0.142455	0	0	23.1111
Std. Error	0.984604	0.0276312	0.726483	0.0276312	0	0	1.00615
Exp. 14. 0% Moisture
Replicate	Stage I	Prop. Stage I	Stage II	Prop. Stage II	Stage III	Prop. Stage III	N
1	40	0.869565	4	0.0869565	2	0.0434783	46
2	14	0.583333	7	0.291667	3	0.125	24
3	13	0.481481	10	0.37037	4	0.148148	27
4	22	0.758621	2	0.0689655	5	0.172414	29
5	16	0.533333	13	0.433333	1	0.0333333	30
6	21	0.75	5	0.178571	2	0.0714286	28
7	20	0.689655	8	0.275862	1	0.0344828	29
8	20	0.689655	7	0.241379	2	0.0689655	29
9	23	0.793103	6	0.206897	1	0.0344828	29
Avg.	21	0.683194	6.88889	0.239334	2.33333	0.0813037	30.1111
Std. Error	2.651	0.0425193	1.08582	0.0401165	0.471405	0.0178904	2.07126
Exp. 15. ≤20% Moisture
Replicate	Stage I	Prop. Stage I	Stage II	Prop. Stage II	Stage III	Prop. Stage III	N
1	4	0.133333	22	0.733333	4	0.133333	30
2	17	0.653846	8	0.307692	1	0.0384615	26
3	14	0.518519	11	0.407407	2	0.0740741	27
4	13	0.5	12	0.461538	1	0.0384615	26
5	10	0.333333	11	0.366667	9	0.3	30
6	10	0.37037	15	0.555556	2	0.0740741	27
7	8	0.266667	13	0.433333	9	0.3	30
8	7	0.25	13	0.464286	8	0.285714	28
9	13	0.448276	14	0.482759	2	0.0689655	29
Avg.	10.6667	0.386038	13.2222	0.468063	4.22222	0.145898	28.1111
Std. Error	1.33333	0.0534597	1.2886	0.0406853	1.15202	0.038464	0.563827
Exp. 16. Pollen ≤35% Moisture
Replicate	Stage I	Prop. Stage I	Stage II	Prop. Stage II	Stage III	Prop. Stage III	N
1	9	0.1875	14	0.291667	25	0.520833	48
2	10	0.222222	20	0.444444	15	0.333333	45
2	1	0.0384615	1	0.0384615	24	0.923077	26
3	2	0.0769231	4	0.153846	20	0.769231	26
4	2	0.0666667	3	0.1	25	0.833333	30
5	1	0.0333333	7	0.233333	22	0.733333	30
6	0	0	2	0.105263	17	0.894737	19
7	2	0.0714286	8	0.285714	18	0.642857	28
8	0	0	3	0.1	27	0.9	30
9	4	0.137931	3	0.103448	22	0.758621	29
Avg.	3.1	0.0834466	6.5	0.185618	21.5	0.730936	31.1
Std. Error	1.19102	0.0253335	2.03215	0.0417322	1.30762	0.0623653	2.929
Exp. 17 Milk Powder (Positive Control)
Replicate	Stage I	Prop. Stage I	Stage II	Prop. Stage II	Stage III	Prop. Stage III	N
1	1	0.03125	4	0.125	27	0.84375	32
2	3	0.0789474	0	0	35	0.921053	38
3	0	0	3	0.130435	20	0.869565	23
4	0	0	3	0.115385	23	0.884615	26
5	3	0.130435	2	0.0869565	18	0.782609	23
6	3	0.103448	0	0	26	0.896552	29
7	0	0	0	0	25	1	25
8	0	0	0	0	28	1	28
9	0	0	1	0.0333333	29	0.966667	30
Avg.	1.11111	0.0382312	1.44444	0.0545677	25.6667	0.907201	28.2222
Std. Error	0.484322	0.0173883	0.529966	0.0196588	1.68325	0.0243072	1.59668
